# Supplementary material for: A comparative study of ordered mesoporous carbons with different pore structures as anode materials for lithium-ion batteries
Source: Royal Society of Chemistry journal article supplement (doi:10.1039/c5ra05168a), 2015-01-01
Supplement: c5ra05168a1.pdf [file c5ra05168a1.pdf]

## **Electronic Supplementary Information for**

### **A comparative study of ordered mesoporous carbons with different pore structures as anode materials for lithium-ion batteries**

Diganta Saikia,<sup>a</sup> Tzu-Hua Wang,<sup>a</sup> Chieh-Ju Chou,<sup>a</sup> Jason Fang,<sup>b</sup> Li-Duan Tsai,<sup>b</sup> and Hsien-Ming Kao<sup>a\*</sup>

<sup>a</sup>Department of Chemistry, National Central University, Chung-Li 32054, Taiwan, R.O.C.

<sup>b</sup>Department of Fuel Cell Materials and Advanced Capacitors, Division of Energy Storage Materials and Technology, Material and Chemical Laboratories, Industrial Technology Research Institute, Hsin-Chu 300, R.O.C.

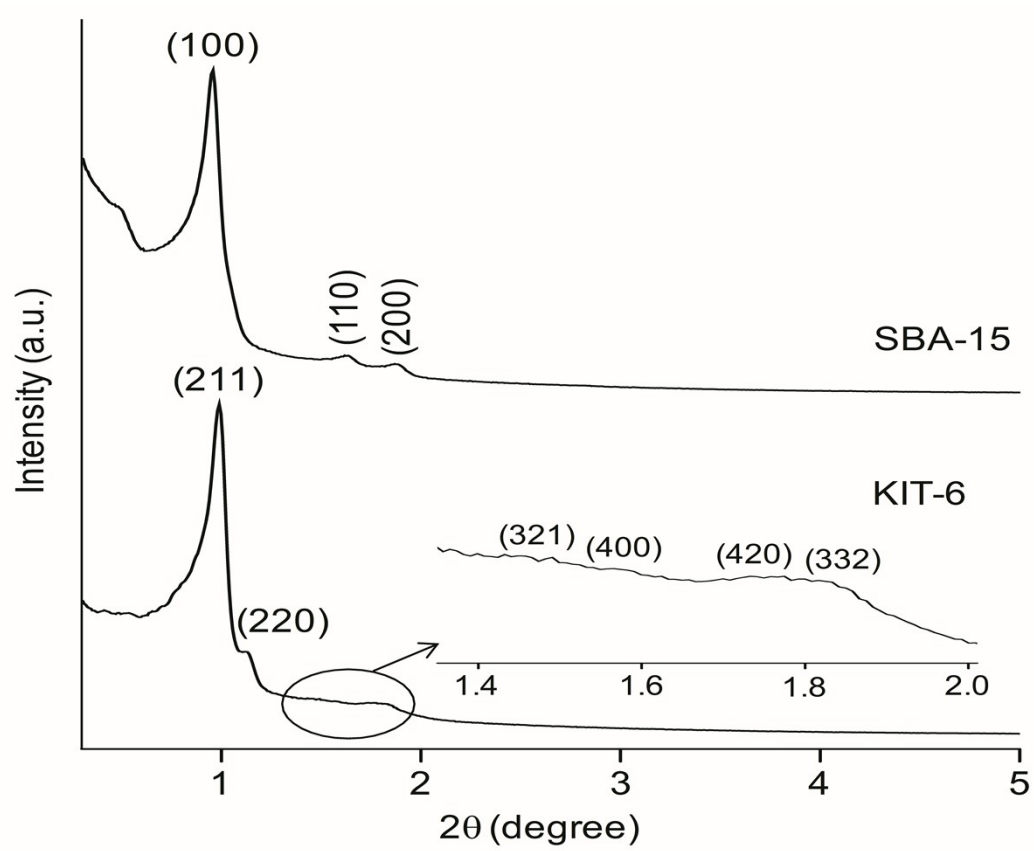

**Fig. S1.** Small angle XRD patterns of SBA-15 and KIT-6.

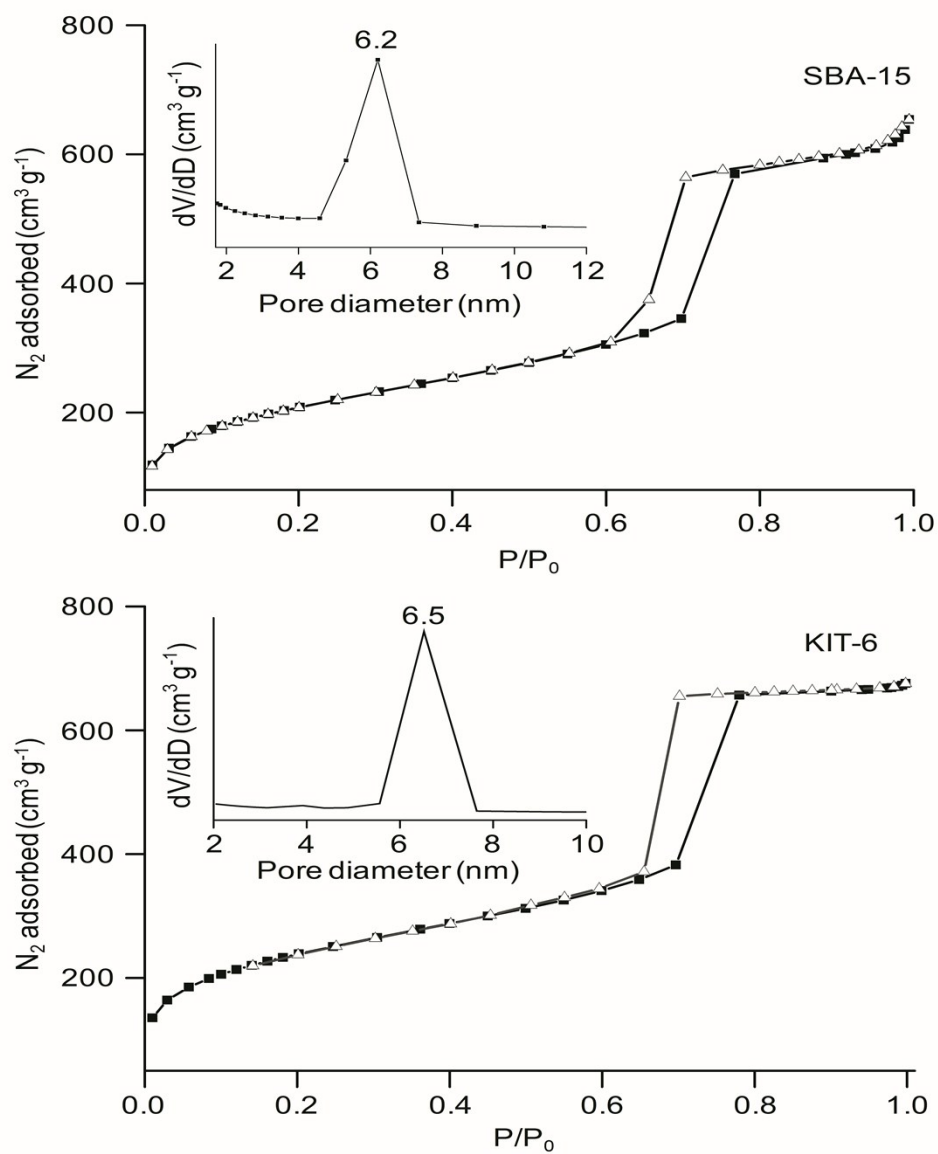

**Fig. S2.**  $N_2$  adsorption-desorption isotherms and pore-size distribution curves of SBA-15 and KIT-6.

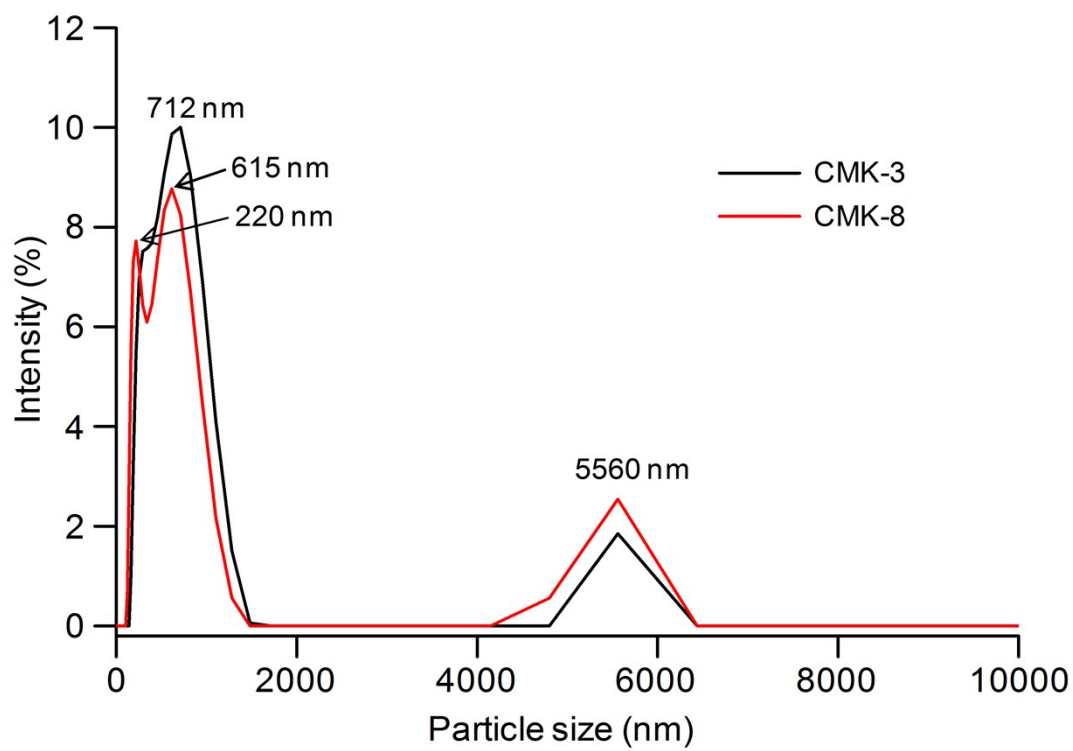

Fig. S3. Dynamic light scattering measurements of CMK-3 and CMK-8 mesoporous carbons.

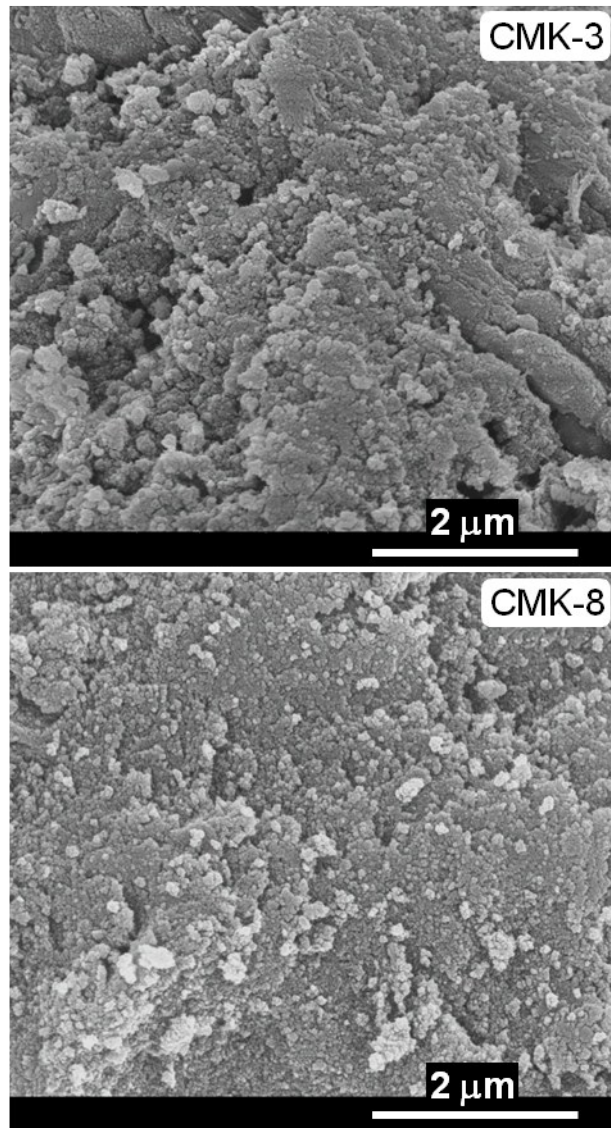

Fig. S4. SEM images of CMK-3 and CMK-8 samples after 100 charge-discharge cycles.
